# Supplementary material for: Varied CO2 photoreduction activities of UiO-66-NH2 MOFs with different aggregation morphologies
Source: Royal Society of Chemistry journal article supplement (doi:10.1039/d4cc04919e), 2024-01-01
Supplement: d4cc04919e1.pdf [file d4cc04919e1.pdf]

## Varied CO<sub>2</sub> photoreduction activity over UiO-66-NH<sub>2</sub> with different morphology

Shu-Ran Zhang<sup>a,b</sup>, Yan-Hong Zou<sup>c</sup>, Hai-Ning Wang<sup>\*c</sup>, Guang-Juan Xu<sup>a</sup>, Wei Xie<sup>a</sup>,  
Na Xu<sup>a</sup>, Yan-Hong Xu<sup>\*a</sup> and Ya-Qian Lan<sup>\*d</sup>

<sup>a</sup>Key Laboratory of Preparation and Applications of Environmental Friendly Materials (Jilin Normal University), Ministry of Education, Changchun 130103, Jilin, People's Republic of China.

<sup>b</sup>The Joint Laboratory of Intelligent Manufacturing of Energy and Environmental Materials, Changchun, 130103, Jilin, People's Republic of China

<sup>c</sup>School of Chemistry and Chemical Engineering, Shandong University of Technology, Zibo 255049, People's Republic of China.

<sup>d</sup>School of Chemistry, National and Local Joint Engineering Research Center of MPTES in High Energy and Safety LIBs, Engineering Research Center of MTEES (Ministry of Education) Key Lab. of ETESPG(GHEI), South China Normal University Guangzhou, 510006 (P. R. China).

## Experimental Section

### Chemicals

All used reagents and solvents are commercially available and used directly. Zirconium tetrachloride (ZrCl<sub>4</sub>, 99.5%), 2-aminoterephthalic acid, Acetic acid glacial, Ethanol, 5% Nafion solution, *N,N*-Dimethylformamide (DMF), were purchased from Shanghai Macklin Biochemical Co., Ltd., China. All chemical reagents were used directly without any further purification. Ultrapure water was used throughout.

### Instruments

Fourier transform infrared spectroscopy (FT-IR) spectra were recorded with a Thermo Nicolet 5700 by using KBr pellets for sample. X-ray powder diffraction patterns of the samples were recorded on a Bruker D8 Advance diffractometer with Cu KR ( $\lambda = 1.5418 \text{ \AA}$ ) radiation in the range of 5–70°. The morphology analysis of the synthesized samples was collected on a scanning electron microscope (SEM, sirion200) at an acceleration voltage of 10 kV. UV-vis absorption spectrum was obtained on UV-2550 spectrophotometer (Shimadzu, Japan). Nitrogen adsorption-desorption isotherms and the CO<sub>2</sub> adsorption/desorption measurements were conducted under 77 K and the ambient condition of 298 K on BeiShiDe Instrument BSD-PS(M) respectively.

### Synthesis and Preparations

Synthesis of BUiO-66-NH<sub>2</sub>

BUiO-66-NH<sub>2</sub> was prepared according to the reported literature [S1].

Synthesis of AUiO-66-NH<sub>2</sub>

AUiO-66-NH<sub>2</sub> was prepared according to the reported literature [S2].

Synthesis of UiO-66-NH<sub>2</sub>

UiO-66-NH<sub>2</sub> was prepared according to the reported literature [S3].

## **2.3 General Catalytic Reduction**

### **2.3.1 Photocatalytic CO<sub>2</sub> reduction**

Photocatalyst (1 mg) was dispersed in 1 mL ethanol and then coated on 1 cm × 3 cm glass. The cover range is 1 cm × 3 cm. The prepared samples were placed in a self-made photocatalytic reactor, and 150 μL distilled water was added at the bottom as the reducing agent. CO<sub>2</sub> was introduced into the reactor to replace air and ensured that the reactor was full of CO<sub>2</sub>. LED lamp was used as the light source. After irradiation for 2 hours, 0.5 mL and 1.0 mL gas were taken and placed in gas chromatography (GC 1120) to determine the content of CO and H<sub>2</sub>.

### **2.3.2 CO<sub>2</sub> Photoreduction Analysis**

The electrochemical analyzer (CHI 760E) was used for photoelectrochemical test and Mott-Schottky test with the standard three electrode system. Sodium sulfate solution (0.2 mol/L) served as the electrolyte. The sample (1 mg) and 5% Nafion solution were added into 2 mL ethanol for 1 h, and then evenly dropped on a 1 cm × 2 cm ITO conductive glass as the working electrode. The reference electrode was the Ag/AgCl electrode and the counter electrode was the platinum electrode.

### **The thermal stability of three UiO-66-NH<sub>2</sub>**

The TG curves of three UiO-66-NH<sub>2</sub> have been performed, and given here, which show that all UiO-66-NH<sub>2</sub> achieve the great thermal stability and are stable up to about 200 °C.

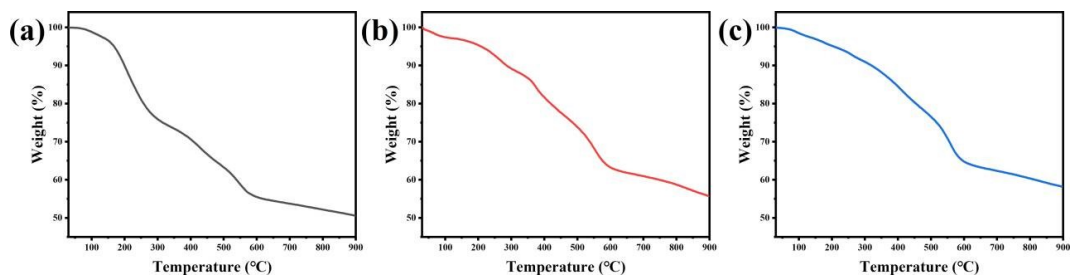

**Fig. S1** The TG curves of BUiO-66-NH<sub>2</sub> (a), AUiO-66-NH<sub>2</sub> (b) and UiO-66-NH<sub>2</sub> (c).

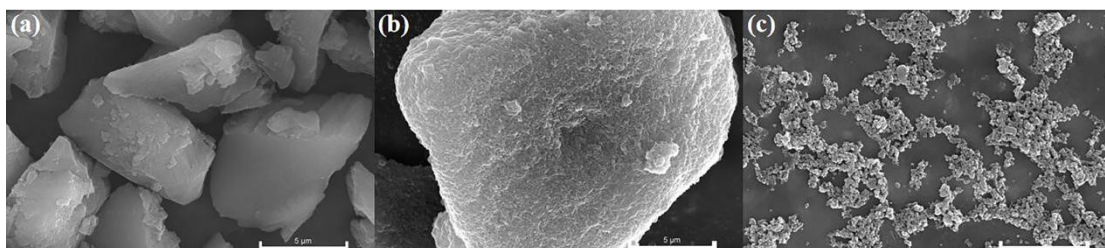

**Fig. S2** The SEM images of (a) BUiO-66-NH<sub>2</sub>, (b) AUiO-66-NH<sub>2</sub> and (c) UiO-66-NH<sub>2</sub>.

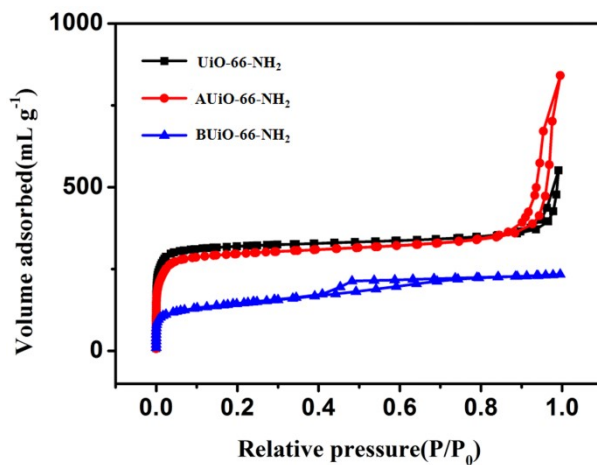

**Fig. S3** The N<sub>2</sub> adsorption-desorption curves of BUiO-66-NH<sub>2</sub>, AUiO-66-NH<sub>2</sub> and UiO-66-NH<sub>2</sub>.

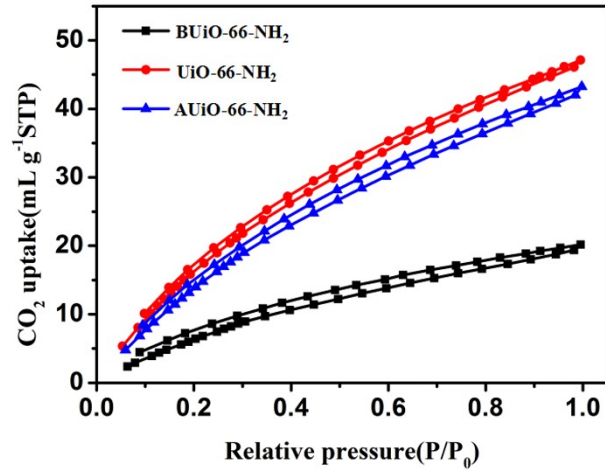

**Fig. S4** The CO<sub>2</sub> absorption of BUiO-66-NH<sub>2</sub>, AUiO-66-NH<sub>2</sub> and UiO-66-NH<sub>2</sub>.

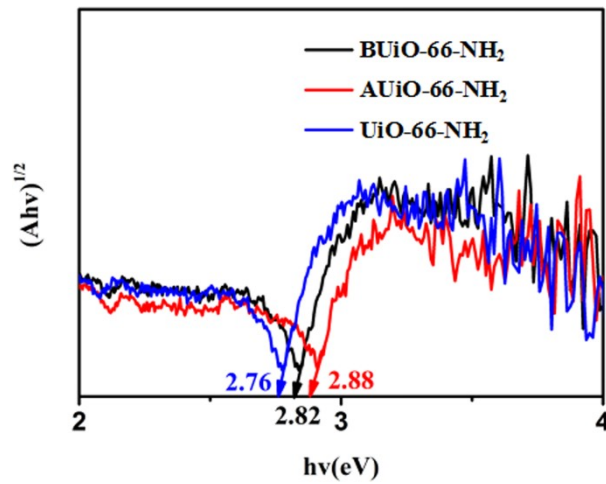

**Fig. S5** The Tauc plots of BUiO-66-NH<sub>2</sub>, AUiO-66-NH<sub>2</sub> and UiO-66-NH<sub>2</sub>.

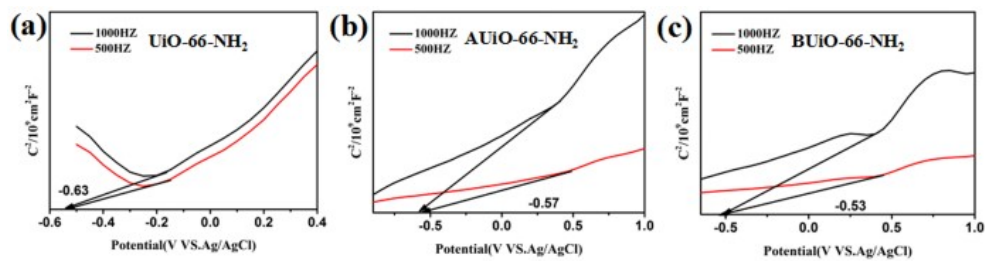

**Fig. S6** The M-S plots of BUiO-66-NH<sub>2</sub>, AUiO-66-NH<sub>2</sub> and UiO-66-NH<sub>2</sub>.

**Table S1** The performances of covered MOFs for CO<sub>2</sub> photoreduction.

| Type                                     | Sacrifice agent  | The formation rate of CO ( $\mu\text{mol g}^{-1} \text{h}^{-1}$ ) | Ref.      |
|------------------------------------------|------------------|-------------------------------------------------------------------|-----------|
| UiO-66-NH <sub>2</sub>                   | H <sub>2</sub> O | 69.3                                                              | This work |
| Bi-PMOF-120-F                            | TEOA             | 28.61                                                             | S4        |
| NH <sub>2</sub> -MIL-125(Ti)             | TEOA             | 8.25                                                              | S5        |
| Co-MOF                                   | TEOA             | 27.1                                                              | S6        |
| Ni-MOF NNs                               | TEOA             | 8.05                                                              | S7        |
| Co <sub>0.1</sub> Ni <sub>0.9</sub> -MOF | H <sub>2</sub> O | 38.74                                                             | S8        |
| Ni-Bpyb                                  | TIPA             | 1326.7                                                            | S9        |
| AQNU-5                                   | TEA              | 56.2                                                              | S10       |
| IHEP-101                                 | H <sub>2</sub> O | 458                                                               | S11       |
| Ni-MOF(H <sub>2</sub> O)                 | TEOA             | 9610                                                              | S12       |
| Co <sub>1</sub> Ni <sub>2</sub> -MOF     | TEOA             | 1160                                                              | S13       |
| Zn/Co/Mo-MOF                             | TEOA             | 38.41                                                             | S14       |
| Co-Fe PBA                                | TEOA             | 14.49                                                             | S15       |
| PCN-601                                  | H <sub>2</sub> O | 6                                                                 | S16       |
| MAF-34-CoRu                              | H <sub>2</sub> O | 11.2                                                              | S17       |
| MOF-74                                   | H <sub>2</sub> O | 1.484                                                             | S18       |
| MIL-101-Cr                               | TEOA             | 8.3                                                               | S19       |

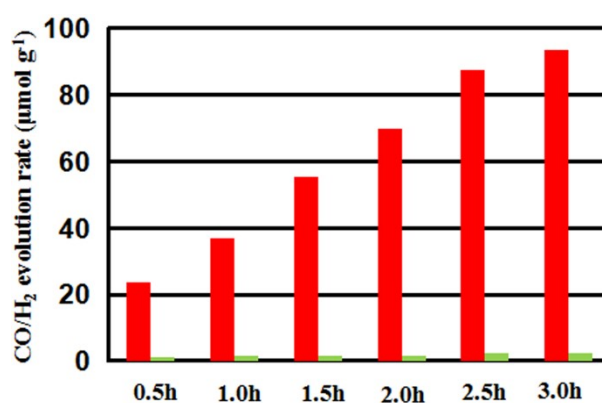**Fig. S7** CO (red column) and H<sub>2</sub> (green column) formation rates of UiO-66-NH<sub>2</sub> at given times.

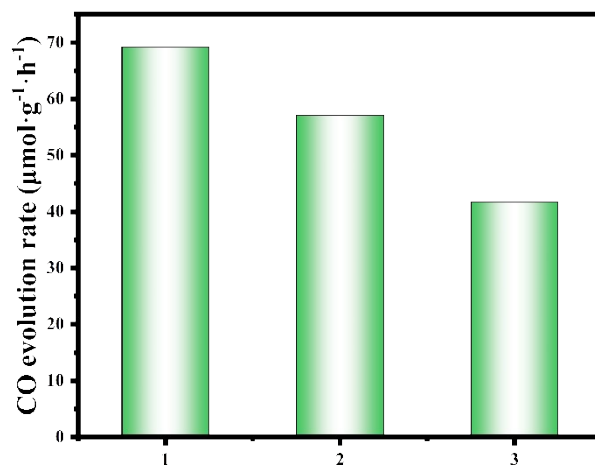

**Fig. S8** The cycling stability of UiO-66-NH<sub>2</sub> in CO<sub>2</sub> photocatalytic reduction experiment.

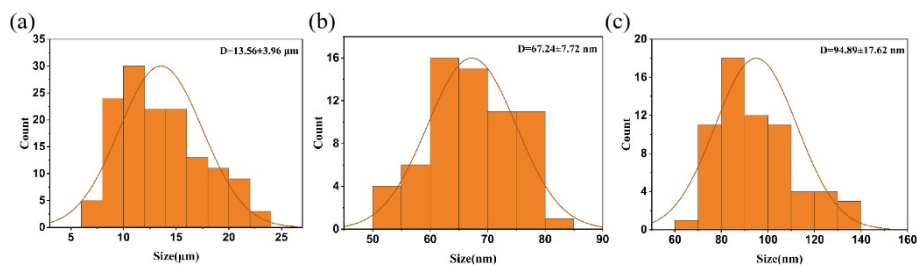

**Fig. S9** Particle size charts of (a) BUiO-66-NH<sub>2</sub>, (b) AUiO-66-NH<sub>2</sub> and (c) UiO-66-NH<sub>2</sub>.

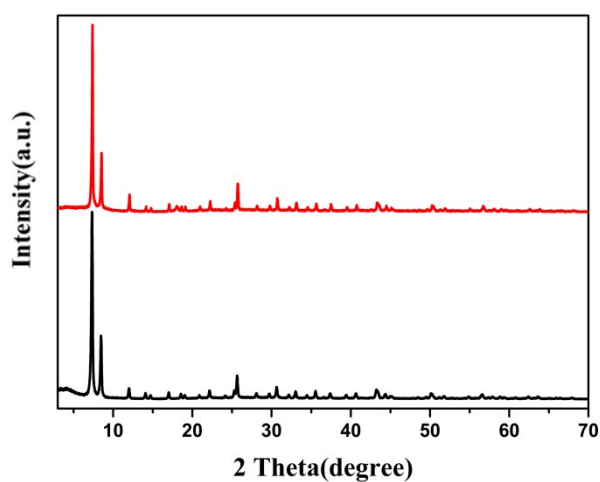

**Fig. S10** The PXRD patterns of UiO-66-NH<sub>2</sub> before (black line) and after (red line) photocatalysis.

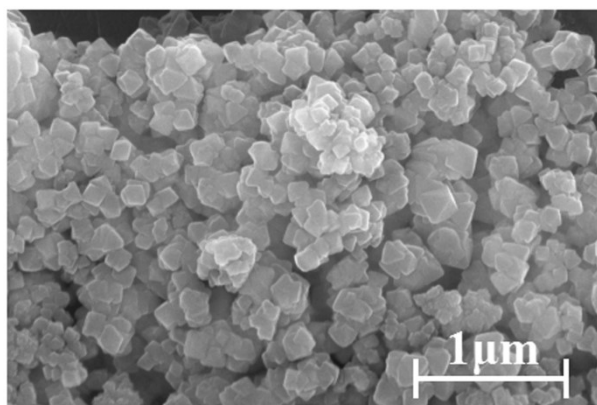

**Fig. S11** The SEM image of UiO-66-NH<sub>2</sub> after photocatalysis.

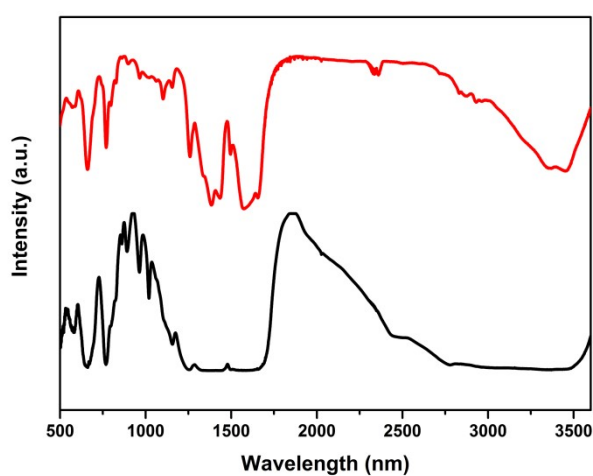

**Fig. S12** The FT-IR spectrum of UiO-66-NH<sub>2</sub> before (black line) and after photocatalysis (red line).

### Reference

S1 B. Bueken, N. V. Velthoven, T. Willhammar, T. Stassin, I. Stassen, D. A. Keen, G. V. Baron, J. F. M. Denayer, R. Ameloot, S. Bals, D. De Vos and T. D. Bennett, *Chem. Sci.*, 2017, **8**, 3939-3948.

S2 N. Assaad, G. Sabeh and M. Hmadeh, *ACS Appl. Nano Mater.*, 2020, **3**, 8997-9008.

S3 G. Wu, J. Ma, S. Li, S. Wang, B. Jiang, S. Luo, J. Li, X. Wang, Y. Guan and L. Chen, *Environ. Res.*, 2020, **186**, 109542.

S4 M. Cheng, P. Yan, X. Zheng, B. Gao, X. Yan, G. Zhang, X. Cui and Q. Xu, *Chem.*

- Eur. J.*, 2023, **2968**, e202302395.
- S5 X.-M. Cheng, X.-Y. Dao, S.-Q. Wang, J. Zhao and W.-Y. Sun, *ACS Catal.*, 2021, **112**, 650-658.
- S6 Y. Liu, C. Chen, J. Valdez, D. Motta Meira, W. He, Y. Wang, C. Harnagea, Q. Lu, T. Guner, H. Wang, C.-H. Liu, Q. Zhang, S. Huang, A. Yurtsever, M. Chaker and D. Ma, *Nat. Commun.*, 2021, **121**, 1231.
- S7 L. Chen, Q. Liu, J. Yang, Y. Li and G. Li, *Chin. Chem. Lett.*, 2023, **342**, 107335.
- S8 T. Wei, L. Wang, K. Mao, J. Chen, J. Dai, Z. Zhang, L. Liu and X. Wu, *J. Colloid Interface Sci.*, 2022, **622**, 402-409.
- S9 H. Yang, C. Lai, M. Wu, S. Wang, Y. Xia, F. Pan, K. Lv and L. Wen, *Chem. Eng. J.*, 2023, **455**, 140425.
- S10 X. Lu, J. Qian, X. Yuan, Y. Lu, J. Sun, H. Zheng and C. Zhang, *Cryst. Growth Des.*, 2023, **239**, 6719-6724.
- S11 Z.-H. Zhou, X.-B. Li, Z.-W. Huang, Q.-Y. Wu, J.-X. Wang, Z.-H. Zhang, J.-P. Yu, L. Mei, F.-Q. Ma, K.-Q. Hu and W.-Q. Shi, *Inorg. Chem. Front.*, 2024, **11**, 6493-6501.
- S12 K. Song, S. Liang, X. Zhong, M. Wang, X. Mo, X. Lei and Z. Lin, *Appl. Catal., B*, 2022, **309**, 121232.
- S13 J. Zhang, Y. Wang, H. Wang, D. Zhong and T. Lu, *Chin. Chem. Lett.*, 2022, **334**, 2065-2068.
- S14 Z.-Y. Du, Y.-Z. Yu, N.-F. Li, Y.-S. Xue, L.-X. Xu, H. Mei and Y. Xu, *Sustain. Energy Fuels*, 2021, **515**, 3876-3883.
- S15 J. Nai, S. Wang and X. W. Lou, *Sci. Adv.*, 2019, **5**, 5095.
- S16 Z.-B. Fang, T.-T. Liu, J. Liu, S. Jin, X.-P. Wu, X.-Q. Gong, K. Wang, Q. Yin, T.-F. Liu, R. Cao and H.-C. Zhou, *J. Am. Chem. Soc.*, 2020, **14228**, 12515-12523.
- S17 N.-Y. Huang, J.-Q. Shen, X.-W. Zhang, P.-Q. Liao, J.-P. Zhang and X.-M. Chen, *J. Am. Chem. Soc.*, 2022, **14419**, 8676-8682.
- S18 Y. Han, H. Xu, Y. Su, Z.-l. Xu, K. Wang and W. Wang, *J. Catal.*, 2019, **370**, 70-78.
- S19 Y. Xie, Z. Fang, L. Li, H. Yang and T.-F. Liu, *ACS Appl. Mater.*, 2019, **1130**,



27017-27023.
